# Supplementary material
Source: PubMed Central journal article supplement (PMC4349416)
Supplement: NIHMS666456-supplement-Wree_Supplementary_data.pdf [file NIHMS666456-supplement-Wree_Supplementary_data.pdf]

**Supplemental Table 1. Sequences of primers used for quantitative PCR.**

| Gene             | Species | Sequence                                                                             |
|------------------|---------|--------------------------------------------------------------------------------------|
| Arg1             | mouse   | FWD 5'-CTC CAA GCC AAA GTC CTT AGA G-3'<br>REV 5'-AGG AGC TGT CAT TAG GGA CAT C-3'   |
| $\alpha$ -SMA    | mouse   | FWD 5'-GTC CCA GAC ATC AGG GAG TAA-3'<br>REV 5'-TCG GAT ACT TCA GCG TCA GGA-3'       |
| Caspase 1        | mouse   | FWD 5'-ACA AGG CAC GGG ACC TAT G-3'<br>REV 5'-TCC CAG TCA GTC CTG GAA ATG-3'         |
| COL1A1           | mouse   | FWD 5'-GCT CCT CTT AGG GGC CAC T-3'<br>REV 5'-CCA CGT CTC ACC ATT GGG G-3'           |
| COL1A1           | human   | FWD 5'-GAG GGC CAA GAC GAA GAC ATC-3'<br>REV 5'-CAG ATC ACG TCA TCG CAC AAC -3'      |
| CTGF             | mouse   | FWD 5'-GGG CCT CTT CTG CGA TTT C-3'<br>REV 5'-ATC CAG GCA AGT GCA TTG GTA-3'         |
| CXCL2            | mouse   | FWD 5'-CCA ACC ACC AGG CTA CAG G-3'<br>REV 5'- GCG TCA CAC TCA AGC TCT G-3'          |
| F4/80            | mouse   | FWD 5'-TGA CTC ACC TTG TGG TCC TAA-3'<br>REV 5'-CTT CCC AGA ATC CAG TCT TTC C-3'     |
| ICAM-1           | mouse   | FWD 5'- GTG ATG CTC AGG TAT CCA TCC A-3'<br>REV 5' CAC AGT TCT CAA AGC ACA GCG-3'    |
| iNOS             | mouse   | FWD 5'-GTT CTC AGC CCA ACA ATA CAA GA-3'<br>REV 5'-GTG GAC GGG TCG ATG TCA C-3'      |
| Ly6c             | mouse   | FWD 5'-GCA GTG CTA CGA GTG CTA TGG-3'<br>REV 5'-ACT GAC GGG TCT TTA GTT TCC TT-3'    |
| MCP1             | mouse   | FWD 5'-TTA AAA ACC TGG ATC GGA ACC AA-3'<br>REV 5'-GCA TTA GCT TCA GAT TTA CGG GT-3' |
| MMP2             | mouse   | FWD 5'-CAA GTT CCC CGG CGA TGT C-3'<br>REV 5'-TTC TGG TCA AGG TCA CCT GTC-3'         |
| NLRP3            | human   | FWD 5'-GAT CTT CGC TGC GAT CAA CAG-3'<br>REV 5'-CGT GCA TTA TCT GAA CCC CAC-3'       |
| pro-IL-1 $\beta$ | mouse   | FWD 5'-GAA ATG CCA CCT TTT GAC AGT G-3'<br>REV 5'-CTG GAT GCT CTC ATC AGG ACA-3'     |
| pro-IL-1 $\beta$ | human   | FWD 5'-TTC GAC ACA TGG GAT AAC GAG G-3'<br>REV 5'-TTT TTG CTG TGA GTC CCG GAG-3'     |
| pro-IL-18        | human   | FWD 5'-TCT TCA TTG ACC AAG GAA ATC GG-3'<br>REV 5'-TCC GGG GTG CAT TAT CTC TAC-3'    |
| TIMP-1           | mouse   | FWD 5'-CTT GGT TCC CTG GCG TAC TC-3'<br>REV 5'-ACC TGA TCC GTC CAC AAA CAG-3'        |
| TNF- $\alpha$    | mouse   | FWD 5'-CCC TCA CAC TCA GAT CAT CTT CT-3'<br>REV 5'-GCT ACG ACG TGG GCT ACA G-3'      |

Arg1: Arginase 1;  $\alpha$ -SMA: alpha-smooth muscle actin; COL1A1: collagen, type I, alpha 1; CTGF: connective tissue growth factor; CXCL2: chemokine (C-X-C motif) ligand 1,2,5; F4/80: mouse macrophage marker; ICAM-1: intercellular adhesion molecule 1; IL: interleukin; iNOS: inducible form of nitric oxide synthase; Ly6c: lymphocyte antigen 6C; MCP1: monocyte chemotactic protein-1; MMP2: matrix metalloproteinase 2; NLRP3: nucleotide-binding oligomerization domain (NOD) leucine-rich-repeat containing receptors (NLR) containing pyrin

domain 3; TIMP-1: tissue inhibitor of matrix metalloproteinase 1; TNF- $\alpha$ : tumor necrosis factor alpha.
